# Supplementary material
Source: publisher figshare collection journal article supplement (https://acs.figshare.com/ndownloader/files/4450576)

**Supporting information Figure 6.** MALDI-TOF-MS spectrometry data of myristoylated MA with C-terminal FLAG:  $Mr_{\text{calc}} = 16271.22$ ,  $Mr_{\text{meas}} = 16271.76$ . Un-myristoylated MA:  $Mr_{\text{calc}} = 16063.04$  was not observed.

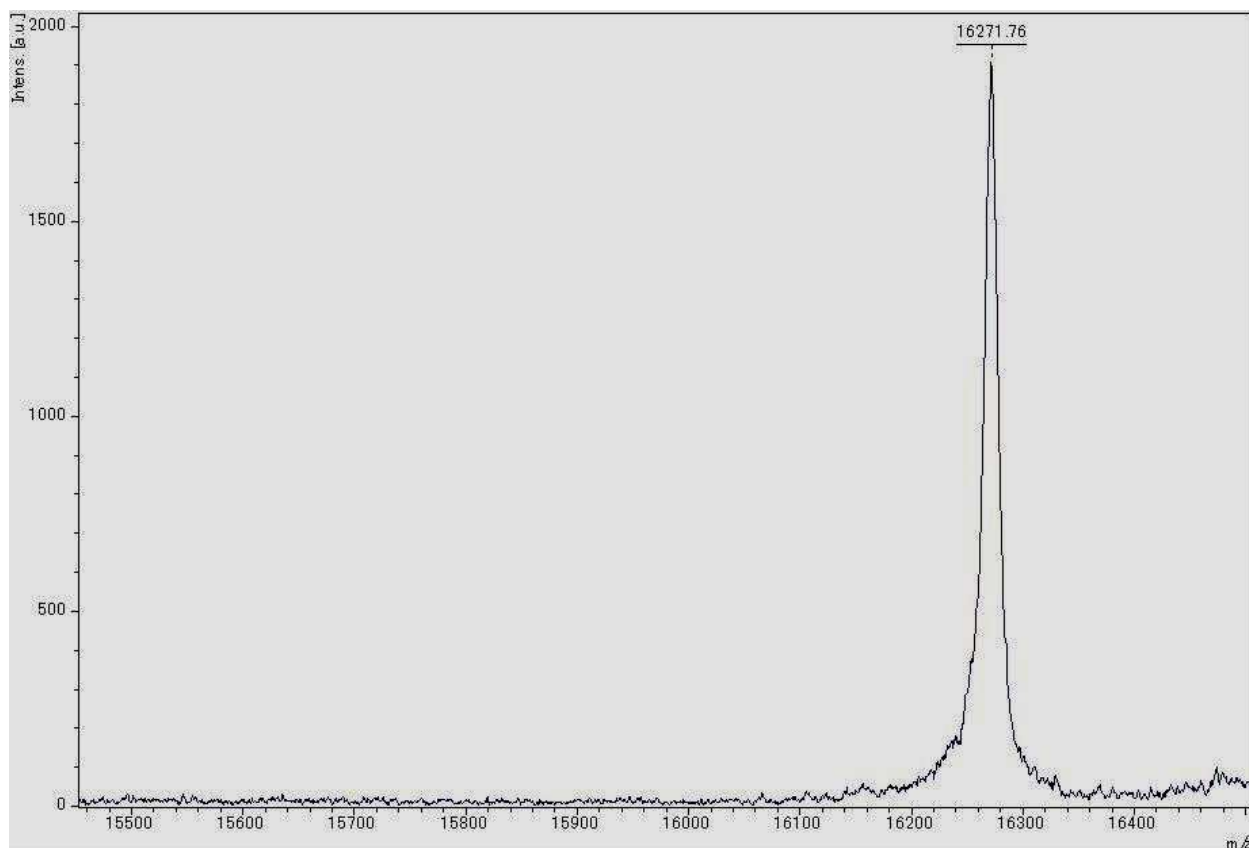

Supplement: Supplementary file 1 [file 4450576]
